# Supplementary material for: Spontaneous calcium transients in hair cell stereocilia
Source: PubMed Central journal article supplement — bioRxiv. 2024 Aug 13:2024.08.12.607658. Preprint. [Version 1] doi: 10.1101/2024.08.12.607658 (PMC11343103; doi:10.1101/2024.08.12.607658), 2024-08-13
Supplement: NIHPP2024.08.12.607658v1-supplement-10.pdf [file NIHPP2024.08.12.607658v1-supplement-10.pdf]

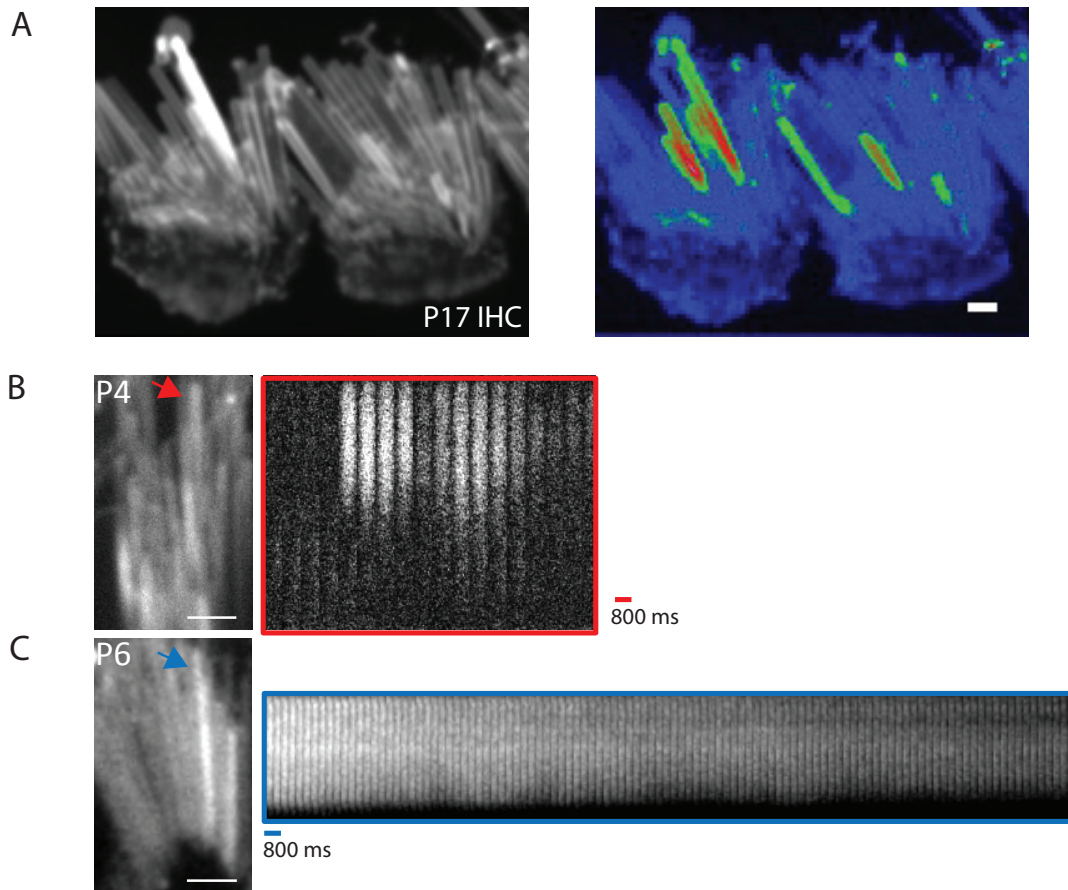

**Figure S1: Individual calcium transients continue after the onset of hearing.**

**A)** Imaging membrane-localized GCaMP3 in acute tissue explants of the organ of Corti at P17 shows that these transients continue after the onset of hearing and MET. The left panel shows inner hair cells at P17 that were imaged at a time interval of 200 ms. The right panel shows the standard deviation projection of the timelapse, where calcium activity in individual stereocilia can be observed. **B)** A P4 utricle is shown with a kymograph of the stereocilium marked with a red arrow. The calcium transient peaks within a time frame of 800 ms. **C)** An example of a transient with a slow decay. Shown here is a P6 sacculus with a kymograph of the stereocilium marked with a blue arrow. Scale bars for all panels are 1 μm.
